# Supplementary material
Source: Springer Nature journal article supplement (https://www.springermedizin.de/resource/supplementary/12888_2008_528_MOESM7_ESM.pdf/9483516)

# Total Cholesterol

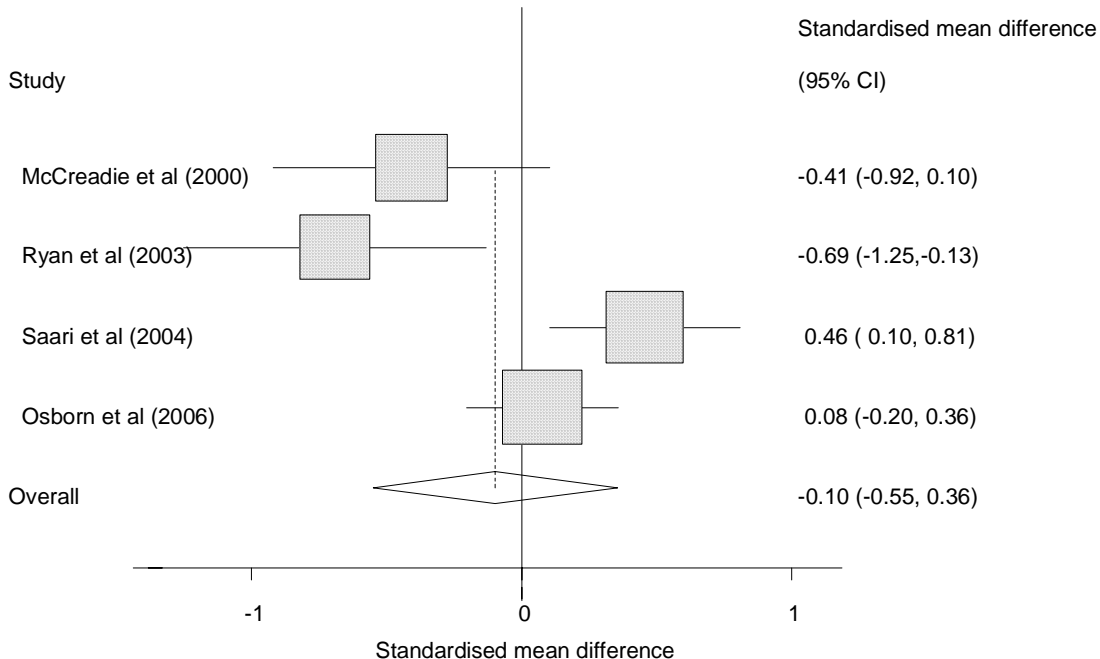

Supplement: MOESM7 [file 9483516]
